# Supplementary material for: A simple preparation method for large-area, wavy graphene oxide nanowalls and their application to freely switchable impedimetric DNA detection
Source: Royal Society of Chemistry journal article supplement (doi:10.1039/c3ra44076a), 2013-01-01
Supplement: c3ra44076a.pdf [file c3ra44076a.pdf]

## Support Information

# A simple preparation method of large–area, wavy graphene oxide nanowalls and its application to freely switchable impedimetric DNA detection

Tao Yang\*, Qian Guan, Le Meng, Ruirui Yang, Qianhe Li, Kui Jiao\*

*College of Chemistry and Molecular Engineering, Qingdao University of Science and Technology,  
Qingdao 266042, China*

\* Corresponding author. Tel: +86-532-84022665; fax: +86-532-84022937.  
*E-mail address:* taoyang@qust.edu.cn (T. Yang)

- 1. The sequences of DNA**
- 2. XPS characterization of GNO-SPAN**
- 3. The Raman spectrum of the GNO**

## References

## 1 The sequences of DNA

The 18 base oligonucleotide probe (ssDNA) with the following sequences: 5'-NH<sub>2</sub>-TCT CAA TGG CTG CCT CCC-3', its complementary DNA (cDNA, target DNA, namely an 18 base fragment of PML/RARA fusion gene sequence formed from promyelocytic leukemia (PML) and retinoic acid receptor alpha (RARA)) with a sequence of 5'-GGG AGG CAG CCA TTG AGA-3', the single-base mismatched DNA of 5'-GGG AAG CAG CCA TTG AGA-3', and the non-complementary sequence DNA (ncDNA) of 5'-AGT TCA TCC TGC GCT CTT-3' were synthesized by Shanghai Sangon Biotechnology Co. Ltd. (Shanghai, China).

## 2 XPS characterization of GNO-SPAN

The C 1s XPS spectrum of GNO-SPAN shown in Figure S1A clearly indicated a certain extent of oxidation of graphite upon chemical exfoliation. The three prominent peaks (284.5, 285.3, 287.0 eV) observed on GNO-SPAN present the existence of a certain amount of functional groups on the surface[1,2]. From N 1s XPS spectrum (Figure S1B), the benzenoid amine with binding energy (BE) centered at 399.5 eV and the nitrogen cationic radical ( $N^{+ \cdot}$ ) with BE at 401.9 eV are clearly identified[3]. As shown in Fig. S1C (S 2p XPS spectrum), the S 2p peaks appeared at 167.4 eV and 168.4 eV are consistent with the existence of  $-SO_3^-$  groups in the GNO-SPAN, which is further confirmed by O 1s XPS spectrum (Fig. S1D, 532.7 eV) [4]. In addition, the peak at 531.1 eV in O 1s XPS spectrum is corresponding to C-O entity[5].

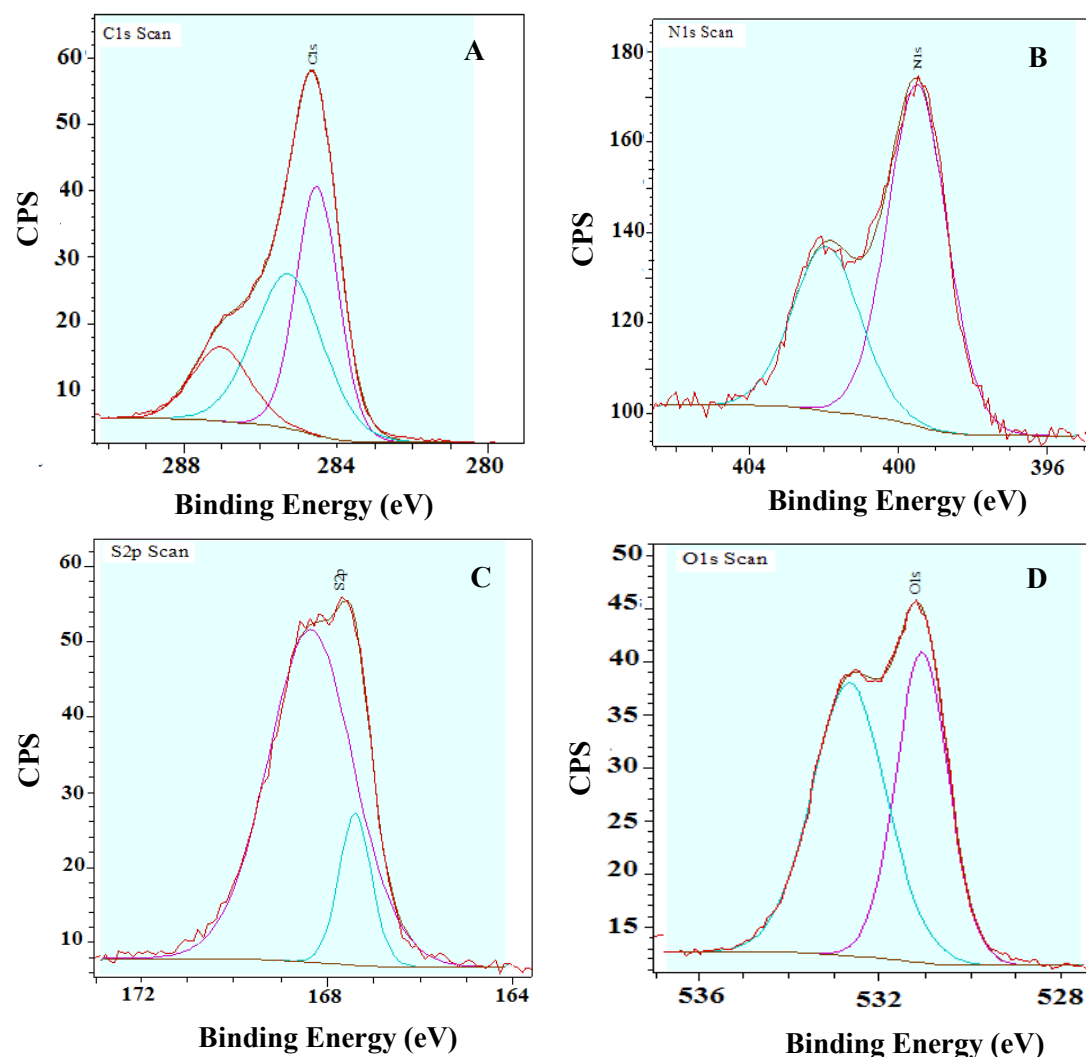

**Fig. S1** The C 1s(A), N 1s(B), O 1s (C) and S 2p (D) XPS spectrum of GNO-SPAN. *Note:* count per second (CPS)

### 3 The Raman spectrum of the GNO

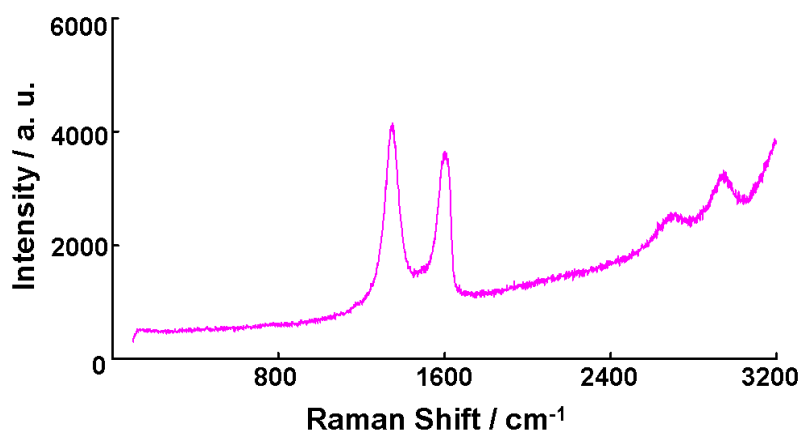

**Fig.S2** The Raman spectrum of the GNO

The Raman spectrum of the GNO (Figure S2) shows the D and G bands of GNO occur at 1348.6 cm<sup>-1</sup> and 1596.4 cm<sup>-1</sup>, respectively. The 2D (2694.1 cm<sup>-1</sup>) band and D+G (2943.3 cm<sup>-1</sup>) band had also occurred. The occurrence and the shape of the 2D band further verified the single-layer structure of the fabricated GNO film [6].

## References

- 1 Y. Wang, S. Zhang, D. Du, Y. Y. Shao, Z. H. Li, J. Wang, M. H. Engelhard, J. H. Li and Y. H. Lin, *J. Mater. Chem.*, 2011, **21**, 5319.
- 2 C. Z. Zhu, S. J. Guo, Y. X. Fang, L. Han, E. K. Wang and S. J. Dong, *Nano Res.*, 2011, **4**, 648.
- 3 X. M. Feng, R. M. Li, Y. W. Ma, R. F. Chen, N. E. Shi, Q. L. Fan and W. Huang, *Adv. Funct. Mater.*, 2011, **21**, 2989.
- 4 S. G. Wu, T. L. Wang, Z. Y. Gao, H. H. Xu, B. N. Zhou and C. Q. Wang, *Biosens. Bioelectron.*, 2008, **23**, 1776.
- 5 S. S. Gupta, T. S. Sreepasad, S. M. Maliyekkal, S. K. Das and T. Pradeep, *ACS Appl. Mater. Interfaces*, 2012, **4**, 4156.
- 6 M. Du, T. Yang and K. Jiao, *J. Mater. Chem.* 2010, **20**, 9253.
